# Supplementary material for: Causes of diabetic ketoacidosis among adults with type 1 diabetes mellitus: insulin pump users and non-users
Source: HighWire-hosted journal article supplement (doi:10.1136/bmjdrc-2020-001329), 2020-12-01
Supplement: bmjdrc-2020-001329supp001_data_supplement.pdf [file bmjdrc-2020-001329supp001_data_supplement.pdf]

Confidential

Questionnaire

|                                       |                                                                                                                                                                                                                  |
|---------------------------------------|------------------------------------------------------------------------------------------------------------------------------------------------------------------------------------------------------------------|
| Record ID                             | <div></div>                                                                                                                                                                                                      |
| MRN                                   | <div></div>                                                                                                                                                                                                      |
| Age                                   | <div></div>                                                                                                                                                                                                      |
| Gender                                | <div><div><input type="radio"/> Male</div><div><input type="radio"/> Female</div></div>                                                                                                                          |
| BMI                                   | <div><div><input type="radio"/> &lt; 18.5</div><div><input type="radio"/> 18.5-25</div><div><input type="radio"/> 25-30</div><div><input type="radio"/> 30-35</div><div><input type="radio"/> &gt;35</div></div> |
| Race                                  | <div></div>                                                                                                                                                                                                      |
| Hemoglobin                            | <div></div>                                                                                                                                                                                                      |
| GFR                                   | <div></div>                                                                                                                                                                                                      |
| diagnosis on admission                | <div></div>                                                                                                                                                                                                      |
| duration of stay                      | <div></div>                                                                                                                                                                                                      |
| days in icu                           | <div></div>                                                                                                                                                                                                      |
| severity of dka                       | <div><div><input type="radio"/> mild</div><div><input type="radio"/> moderate</div><div><input type="radio"/> severe</div></div>                                                                                 |
| diabetic complications                | <div><div><input type="checkbox"/> none</div><div><input type="checkbox"/> retinopathy</div><div><input type="checkbox"/> nephropathy</div><div><input type="checkbox"/> neuropathy</div></div>                  |
| Does the patient use an insulin pump? | <div><div><input checked="" type="radio"/> Yes</div><div><input type="radio"/> No</div></div>                                                                                                                    |

*Confidential*

Page 2

|                                                                                        |                                                                                                                                                                                                              |    |
|----------------------------------------------------------------------------------------|--------------------------------------------------------------------------------------------------------------------------------------------------------------------------------------------------------------|----|
| Pump Device                                                                            | <input type="radio"/> Medtronic<br><input type="radio"/> Animas<br><input type="radio"/> Omnipod<br><input type="radio"/> Tandem Diabetes<br><input type="radio"/> Accu check<br><input type="radio"/> Other |    |
| How old is the current pump                                                            | <input type="radio"/> < 5 years<br><input type="radio"/> >5 years                                                                                                                                            |    |
| Duration on pump                                                                       | <input type="radio"/> < 5 years<br><input type="radio"/> 5-10 years<br><input type="radio"/> >10 years                                                                                                       |    |
| How was the patient trained on the pump                                                | <input type="radio"/> pump company<br><input type="radio"/> MD office<br><input type="radio"/> other                                                                                                         |    |
| Does the patient know his or her pump settings                                         | <input type="radio"/> Yes<br><input type="radio"/> No                                                                                                                                                        |    |
|                                                                                        | yes                                                                                                                                                                                                          | no |
| If yes, does the patient know the<br><input type="radio"/> current basal rates         | <input type="radio"/>                                                                                                                                                                                        |    |
| If yes, can patient demonstrate a<br><input type="radio"/> basal rate ?                | <input type="radio"/>                                                                                                                                                                                        |    |
| if yes, does patient use bolus<br><input type="radio"/> wizard / or bolus              | <input type="radio"/>                                                                                                                                                                                        |    |
| if yes, can patient show how to<br><input type="radio"/> look up current carb ratio    | <input type="radio"/>                                                                                                                                                                                        |    |
| If, no how does the patient calculate insulin dose for carb intake?<br>_____           |                                                                                                                                                                                                              |    |
| Can patient demonstrate suspending insulin delivery                                    | <input type="radio"/> Yes<br><input type="radio"/> No                                                                                                                                                        |    |
| If no, how does patient calculate correction insulin dose<br>_____                     |                                                                                                                                                                                                              |    |
| What action did patient take when blood glucose continued to increase/symptoms of DKA? | <input type="checkbox"/> Corrected through pump<br><input type="checkbox"/> Injected s/c<br><input type="checkbox"/> Check ketones<br><input type="checkbox"/> Hydrate<br><input type="checkbox"/> Other     |    |
| Does patient have back up plan if pump malfunctions?                                   | <input type="radio"/> Yes<br><input type="radio"/> No                                                                                                                                                        |    |
| How often does the patient change pump site?                                           | <input type="radio"/> 2-3 days<br><input type="radio"/> 3-5 days<br><input type="radio"/> 5-7 days                                                                                                           |    |

*Confidential*

Page 3

|                                                                                  |                                                                                                                                                |
|----------------------------------------------------------------------------------|------------------------------------------------------------------------------------------------------------------------------------------------|
| Did the patient take all of his/her insulin shots at prescribed times            | <input type="radio"/> Yes<br><input type="radio"/> No                                                                                          |
| Did patient have lack of insulin supplies?                                       | <input type="radio"/> Yes<br><input type="radio"/> No                                                                                          |
| did patient check insulin expiration date before using?                          | <input type="radio"/> Yes<br><input type="radio"/> No                                                                                          |
| Does the patient know about hyperglycemic sick day management/DKA prevention     | <input type="radio"/> Yes<br><input type="radio"/> No                                                                                          |
| Is the patient on any non insulin medication for DM?                             | <input type="radio"/> Yes<br><input type="radio"/> No                                                                                          |
| Does the patient know how to count carbs                                         | <input type="radio"/> Yes<br><input type="radio"/> No                                                                                          |
| Does the patient know how to use correctional sliding scale                      | <input type="radio"/> Yes<br><input type="radio"/> No                                                                                          |
| Duration of DM                                                                   | <input type="radio"/> < 5 years<br><input type="radio"/> 5-10 years<br><input type="radio"/> more than 10 years                                |
| Number of DKA episodes over last 12 months                                       | <input type="checkbox"/> 0<br><input type="checkbox"/> 1<br><input type="checkbox"/> 2<br><input type="checkbox"/> >2                          |
| Number of hypoglycemic events in last 6 months                                   | <input type="radio"/> less than 5<br><input type="radio"/> 5-10<br><input type="radio"/> 10-20<br><input type="radio"/> >20                    |
| Number of hypoglycemic event needing another persons assistance in last 6 months | <input type="radio"/> less than 1<br><input type="radio"/> 1-3<br><input type="radio"/> >3                                                     |
| Did patient have any recent changes in insulin regimen or settings               | <input type="radio"/> Yes<br><input type="radio"/> No                                                                                          |
| HBA1C                                                                            | <input type="radio"/> 6-7<br><input type="radio"/> 7-8<br><input type="radio"/> 8-9<br><input type="radio"/> 9-10<br><input type="radio"/> >10 |
| Does the patient have CGM                                                        | <input type="radio"/> Yes<br><input type="radio"/> No                                                                                          |
| Is the patient on steroids                                                       | <input type="radio"/> Yes<br><input type="radio"/> No                                                                                          |

Confidential

|                            |                                                                                                                                                                                                                        |
|----------------------------|------------------------------------------------------------------------------------------------------------------------------------------------------------------------------------------------------------------------|
| Possible reason for DKA    | <div><input type="radio"/> non compliance</div> <div><input type="radio"/> pump/tubing related</div> <div><input type="radio"/> infection</div> <div><input type="radio"/> other</div>                                 |
| Education level            | <div><input type="radio"/> High school</div> <div><input type="radio"/> Undergrad</div> <div><input type="radio"/> Bachelors</div> <div><input type="radio"/> Masters</div> <div><input type="radio"/> Doctorate</div> |
| Insulin: Carb Ratio        | <div></div>                                                                                                                                                                                                            |
| Insulin sensitivity factor | <div></div>                                                                                                                                                                                                            |
| Targets                    | <div></div>                                                                                                                                                                                                            |
| Basal rates                | <div></div>                                                                                                                                                                                                            |
| Active insulin time        | <div></div>                                                                                                                                                                                                            |
